# Supplementary material
Source: MDPI journal article supplement (https://www.mdpi.com/search?q=pharmaceutics-12-00900)
Supplement: s001 [file pharmaceutics-12-00900-s001.pdf]

## Supplementary Materials: Optimisation of *Mycobacterium bovis* BCG Fermentation and Storage Survival

Jordan Pascoe, Charlotte L. Hendon-Dunn, Colin P.D. Birch, Gareth A. Williams, Mark A. Chambers and Joanna Bacon

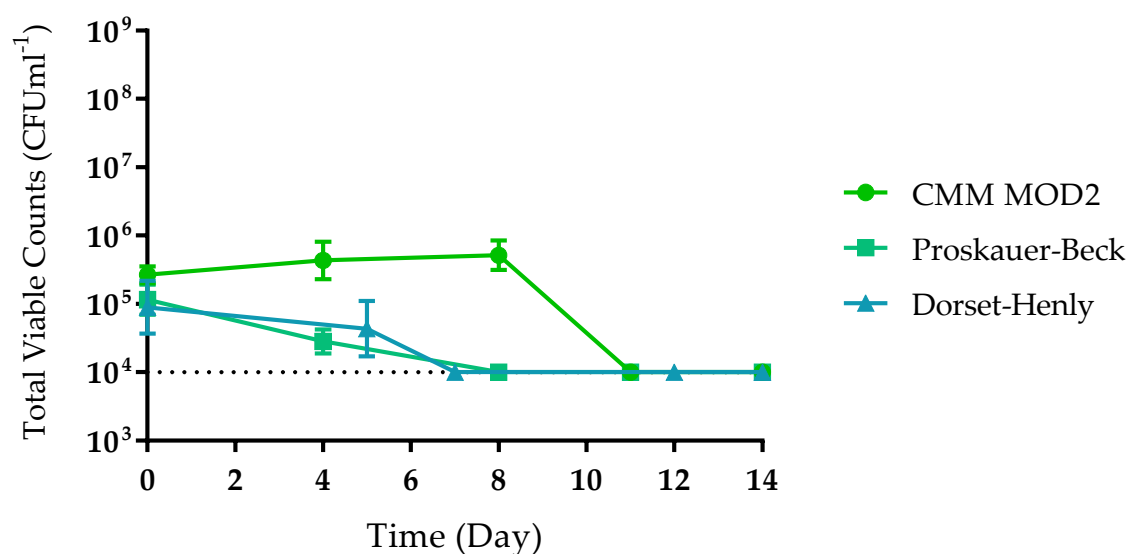

**Figure S1.** The total viable counts of *M. bovis* BCG flask grown in 50 mL of either CMM MOD2, Proskauer-Beck or Dorset-Henly, over 14 days. Cultured in 250 mL vented Erlenmeyer flasks shaking at 200RPM at 37°C. 100µl samples were taken, a 10-fold dilution series performed and spotted onto 7H10 + 10% OADC agar using the Miles and Misra method. Plates were incubated for three weeks at 37°C and then colonies enumerated. Dotted line represents the limit of detection. Data represents the mean average of three biological repeats ± standard error.

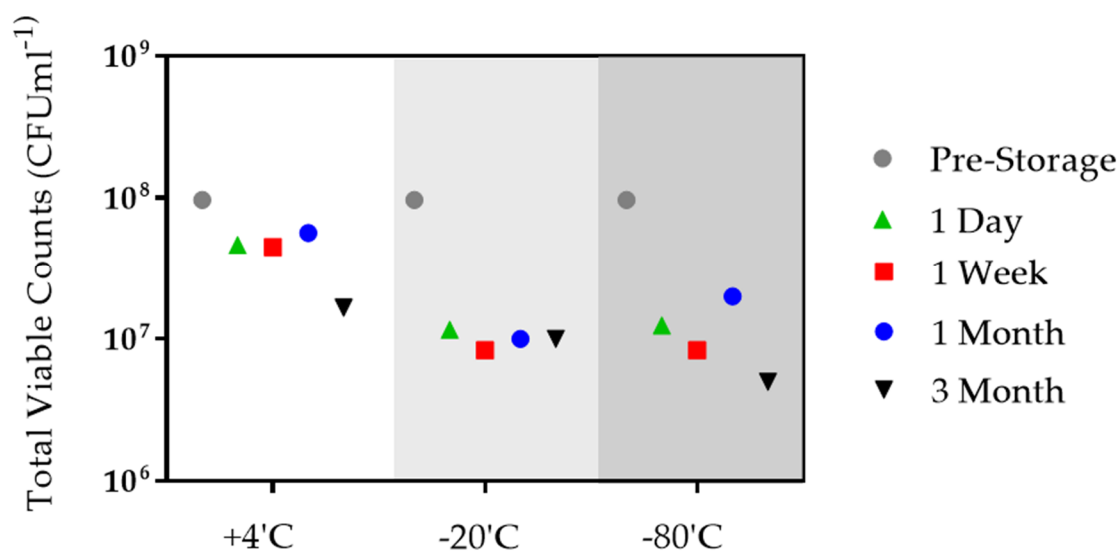

**Figure S2.** The total viable counts of *M.bovis* BCG (fermenter-grown in Middlebrook 7H9) over time stored at +4°C, -20°C, and -80°C. A 20ml sample was taken from the fermenter grown *M.bovis* BCG after 12 days of culture. The sample was spun at 3750RPM, supernatant removed and resuspended in 20ml of 1.5% MSG (w/v in water). Triplicate samples of 100µl were then taken to assess pre-storage total viable counts via a 10-fold dilution series, performing a modified Miles and Misra method. 100µl samples were stored at +4°C, -20°C, and -80°C, and then an individual sample removed after one day, one week, one month and three months for enumeration via a modified Miles and Misra method. Data represents a single biological replicate.

**Table S1.** Recipe of Middlebrook 7H9 <sup>1</sup>.

| Component                              | Amount g/L |
|----------------------------------------|------------|
| L-glutamic acid                        | 0.5        |
| Glycerol                               | 5 (mL)     |
| Tween 80                               | 2 (mL)     |
| Disodium Phosphate                     | 2.5        |
| Monopotassium Phosphate                | 1          |
| Magnesium Sulphate                     | 0.05       |
| Calcium Chloride                       | 0.0005     |
| Ammonium Sulphate                      | 0.5        |
| Sodium Citrate                         | 0.1        |
| Oleic Albumin Dextrose Catalase (OADC) | 100(mL)    |
| Ferric ammonium Citrate                | 0.04       |
| Zinc sulphate                          | 0.001      |
| Copper Sulfate                         | 0.001      |
| Pyridoxine                             | 0.001      |
| Biotin                                 | 0.0005     |

<sup>1</sup> Medium prepared from Middlebrook 7H9 broth base bottle (BD Difco™).

**Table S2.** Recipe of Sauton's minimal medium.

| <b>Component</b>        | <b>Amount g/L</b> |
|-------------------------|-------------------|
| L-Asparagine            | 4                 |
| Glycerol                | 60 (mL)           |
| Tween 80                | 2 (mL)            |
| Monopotassium Phosphate | 0.5               |
| Magnesium Sulphate      | 0.5               |
| Citric Acid             | 2                 |
| Ferric Ammonium Citrate | 0.05              |

**Table S3.** Recipe of Roisin's minimal medium.

| <b>Component</b>             | <b>Amount ml/L</b> |
|------------------------------|--------------------|
| Glycerol                     | 5                  |
| Tween 80                     | 2                  |
| ×10 Basic Salts Solution     | 100                |
| 1 M Calcium Chloride         | 0.5                |
| 1 M Magnesium Chloride       | 0.5                |
| ×1000 Trace Element Solution | 1                  |

**Table S4.** Recipes of the ×10 Basic Salt Solution and ×1000 Trace Element Solution used in Roisin's minimal medium.

| <b>×10 Basic Salt Solution</b>       | <b>Amount g/1L</b>  |
|--------------------------------------|---------------------|
| Ammonium Chloride                    | 59                  |
| Disodium Phosphate                   | 25                  |
| Potassium Phosphate monobasic        | 10                  |
| Potassium Sulphate                   | 20                  |
| <b>×1000 Trace Elements Solution</b> | <b>Amount mg/1L</b> |
| Zinc Chloride                        | 80                  |
| Iron(III) Chloride                   | 400                 |
| Copper(II) Chloride                  | 20                  |
| Manganese(II) Chloride               | 20                  |
| Sodium Tetraborate Decahydrate       | 20                  |
| Ammonium Molybdate Tetrahydrate      | 20                  |

**Table S5.** Recipe of CMM MOD2 medium.

| <b>Component</b>         | <b>Amount g/L</b> |
|--------------------------|-------------------|
| L-asparagine             | 2                 |
| L-serine                 | 0.1               |
| L-alanine                | 0.1               |
| L-arginine               | 0.1               |
| L-aspartic acid          | 0.1               |
| L-glycine                | 0.1               |
| L-isoleucine             | 0.1               |
| L-leucine                | 0.1               |
| L-glutamic acid          | 0.1               |
| Glycerol                 | 0.75              |
| Tween 80                 | 2 (ml)            |
| ACES Buffer              | 10                |
| Monopotassium Phosphate  | 0.22              |
| Sodium Bicarbonate       | 0.042             |
| Magnesium Sulphate       | 0.214             |
| Calcium Chloride         | 0.00055           |
| Pyruvic Acid Sodium Salt | 1                 |
| Zinc Sulphate            | 0.0288            |
| Iron Sulphate            | 0.01              |
| Cobalt Chloride          | 0.00048           |
| Copper Sulfate           | 0.000025          |
| Manganese Chloride       | 0.00002           |
| Biotin                   | 0.0001            |

**Table S6.** Recipe of Proskauer-Beck medium.

| <b>Component</b>        | <b>Amount g/L</b> |
|-------------------------|-------------------|
| Glycerol                | 20.0 (mL)         |
| Tween 80                | 2 (mL)            |
| L-Asparagine            | 5.0               |
| Magnesium Citrate       | 2.0               |
| Monopotassium Phosphate | 5.0               |
| Magnesium Sulphate      | 0.6               |

**Table S7.** Recipe of Dorset-Henly medium.

| <b>Component</b>            | <b>Amount g/L</b> |
|-----------------------------|-------------------|
| Glycerol                    | 8 (mL)            |
| Glucose                     | 10                |
| Tween 80                    | 2 (mL)            |
| L-Asparagine                | 14                |
| Sodium Citrate              | 0.74              |
| Monopotassium Phosphate     | 1.5               |
| Magnesium Sulphate          | 1.5               |
| ×100 Trace Element Solution | 1 (mL)            |
| Ferric ammonium citrate     | 0.681             |

**Table S8.** Recipe of the  $\times 100$  Trace Element solution used in Dorset-Henly medium.

| $\times 100$ Trace Element Solution | Amount g/0.4L |
|-------------------------------------|---------------|
| Zinc Sulphate                       | 8             |
| Manganese Chloride                  | 0.8           |
| Cobalt Chloride                     | 0.4           |

**Table S9.** Factorial ANOVA was performed on the changes in the total viable counts (CFU/mL) between pre- and post-storage for the combined parameters to assess whether individual parameters or interactions between parameters exhibited a statistically significant impact on *M. bovis* BCG stability. '\*\*\*\*'  $p = 0.001$ , '\*\*'  $p = 0.05$ .

| Factors                               | <i>p</i> -value |
|---------------------------------------|-----------------|
| Temperature                           | 0.0001 ****     |
| Cryoprotectant                        | 0.0004 ****     |
| Temperature:Cryoprotectant            | 0.0442 *        |
| Day                                   | 0.0951          |
| Media                                 | 0.1165          |
| Media:Temperature:Day                 | 0.1673          |
| Media:Day                             | 0.2041          |
| Media:Temperature                     | 0.4096          |
| Media: Cryoprotectant                 | 0.6212          |
| Temperature:Day                       | 0.9525          |
| Media:Temperature: Cryoprotectant     | 0.9656          |
| Media:Cryoprotectant:Day              | 0.9943          |
| Cryoprotectant:Day                    | 0.9968          |
| Media:Temperature: Cryoprotectant:Day | 0.9973          |
| Temperature: Cryoprotectant:Day       | 0.9993          |
